# Supplementary material for: Enhanced Image Processing Using Complex Averaging in Diffusion-Weighted Imaging of the Prostate: The Impact on Image Quality and Lesion Detectability
Source: MDPI journal article supplement (doi:10.3390/diagnostics13142325), 2023-07-10
Supplement: s1 [file s1]

**Supplementary table** Detailed overview showing biopsy results, PSA-level (ng/ml), and DWI score in the peripheral and transition zone for standard images and EIP images. BPH: benign prostate hyperplasia; PSA: prostate-specific antigen; EIP: enhanced image processing

| Pathology           | Patient number | age  | PSA (ng/ml) | Peripheral zone<br>DWI score |     | Transition zone<br>DWI score |     |
|---------------------|----------------|------|-------------|------------------------------|-----|------------------------------|-----|
|                     |                |      |             | standard                     | EIP | standard                     | EIP |
| Gleason 6           | 14             | 70.8 | 13.3        |                              |     |                              | 4   |
| Gleason 6           | 18             | 78.2 | 10.0        |                              |     | 5                            | 5   |
| Gleason 6           | 32             | 72.9 | 13.0        | 3                            | 4   |                              |     |
| Gleason 6           | 53             | 79.9 | 20.6        | 5                            | 5   | 5                            | 5   |
| Gleason 7           | 2              | 72.2 | 9.8         |                              |     | 5                            | 5   |
| Gleason 7           | 5              | 76.1 | 2.0         | 3                            | 4   |                              |     |
| Gleason 7           | 7              | 67.2 | 25.0        | 4                            | 4   | 4                            | 4   |
| Gleason 7           | 8              | 74.2 | 20.4        | 5                            | 5   |                              |     |
| Gleason 7           | 9              | 78.8 | 6.6         | 5                            | 5   |                              |     |
| Gleason 7           | 10             | 76.4 | 2.0         | 5                            | 5   |                              |     |
| Gleason 7           | 12             | 73.3 | 10.0        |                              |     | 3                            | 4   |
| Gleason 7           | 16             | 59.0 | 4.0         | 5                            | 5   |                              |     |
| Gleason 7           | 19             | 81.2 | 8.5         | 5                            | 5   | 4                            | 4   |
| Gleason 7           | 23             | 78.0 | 4.9         | 5                            | 5   |                              |     |
| Gleason 7           | 26             | 67.8 | 5.4         | 4                            | 4   |                              |     |
| Gleason 7           | 30             | 56.4 | 6.7         | 4                            | 4   |                              |     |
| Gleason 7           | 36             | 61.0 | 11.2        | 4                            | 4   | 4                            | 4   |
| Gleason 7           | 37             | 85.7 | 9.7         |                              |     |                              |     |
| Gleason 7           | 40             | 79.9 | 3.1         | 4                            | 4   |                              |     |
| Gleason 7           | 41             | 60.9 | 21.0        | 4                            | 4   |                              | 4   |
| Gleason 7           | 42             | 76.6 | 5.0         |                              | 4   | 5                            | 5   |
| Gleason 7           | 43             | 68.9 | 7.3         | 4                            | 4   |                              |     |
| Gleason 7           | 47             | 59.1 | 5.2         | 4                            | 4   |                              |     |
| Gleason 7           | 48             | 58.2 | 5.5         | 4                            | 4   |                              |     |
| Gleason 7           | 49             | 53.1 | 27.6        | 5                            | 5   |                              |     |
| Gleason 7           | 50             | 71.8 | 19.0        | 5                            | 5   | 5                            | 5   |
| Gleason 7           | 51             | 61.8 | 5.2         | 4                            | 4   |                              |     |
| Gleason 7           | 52             | 54.0 | 4.6         |                              | 3   | 5                            | 5   |
| Gleason 8           | 4              | 76.4 | 23.2        | 5                            | 5   |                              |     |
| Gleason 8           | 21             | 67.2 | 8.3         | 4                            | 4   |                              |     |
| Gleason 8           | 35             | 76.5 | 10.0        | 4                            | 4   |                              | 4   |
| Gleason 9           | 28             | 55.3 | 11.0        | 4                            | 4   |                              |     |
| Gleason 9           | 39             | 69.4 | 41.0        | 5                            | 5   |                              |     |
| BPH                 | 1              | 67.7 | 11.1        | 4                            | 4   | 5                            | 5   |
| BPH                 | 17             | 69.4 | 7.2         |                              |     |                              | 4   |
| BPH                 | 31             | 54.4 | 16.4        | 3                            | 4   |                              | 5   |
| BPH                 | 33             | 71.8 | 1.0         |                              |     | 4                            | 4   |
| BPH                 | 46             | 71.5 | 5.4         |                              |     | 4                            | 4   |
| chronic prostatitis | 3              | 77.4 | 22.6        |                              |     |                              | 4   |

|                     |    |      |      |   |   |   |   |
|---------------------|----|------|------|---|---|---|---|
| chronic prostatitis | 15 | 85.9 | 7.0  |   |   | 5 | 5 |
| chronic prostatitis | 20 | 75.5 | 13.8 | 4 | 4 | 4 | 4 |
| chronic prostatitis | 24 | 74.0 | 10.8 | 4 | 4 |   |   |
| chronic prostatitis | 27 | 56.5 | 3.1  | 4 | 4 |   |   |
| chronic prostatitis | 29 | 74.3 | 8.1  | 3 | 4 | 4 | 4 |
| chronic prostatitis | 45 | 61.6 | 5.0  |   |   | 3 | 3 |
| no biopsy           | 6  | 65.5 | 7.2  |   |   | 4 | 4 |
| no biopsy           | 11 | 60.2 | 4.2  | 3 | 4 | 3 | 3 |
| no biopsy           | 13 | 68.2 | 4.0  |   |   | 4 | 4 |
| no biopsy           | 22 | 31.2 | 5.0  |   |   |   |   |
| no biopsy           | 25 | 78.7 | 2.6  | 5 | 5 |   |   |
| no biopsy           | 34 | 65.5 | 0.9  | 5 | 5 |   |   |
| no biopsy           | 38 | 78.3 | 17.1 | 5 | 5 |   |   |
| no biopsy           | 44 | 58.9 | 4.3  |   |   |   |   |
